# Supplementary material
Source: Springer Nature journal article supplement (https://www.springermedizin.de/resource/supplementary/13019_2010_312_MOESM2_ESM.pdf/9638366)

0-Aug-1967

Feb-2004

36.36.53

MA 61

PI 2

P -229.0

VA40C  
H-SP-CR

V 140

ff mAs 100

nA 300

1.05

ST 0.0

0.00.515.0

10cm

k  
n  
T  
C

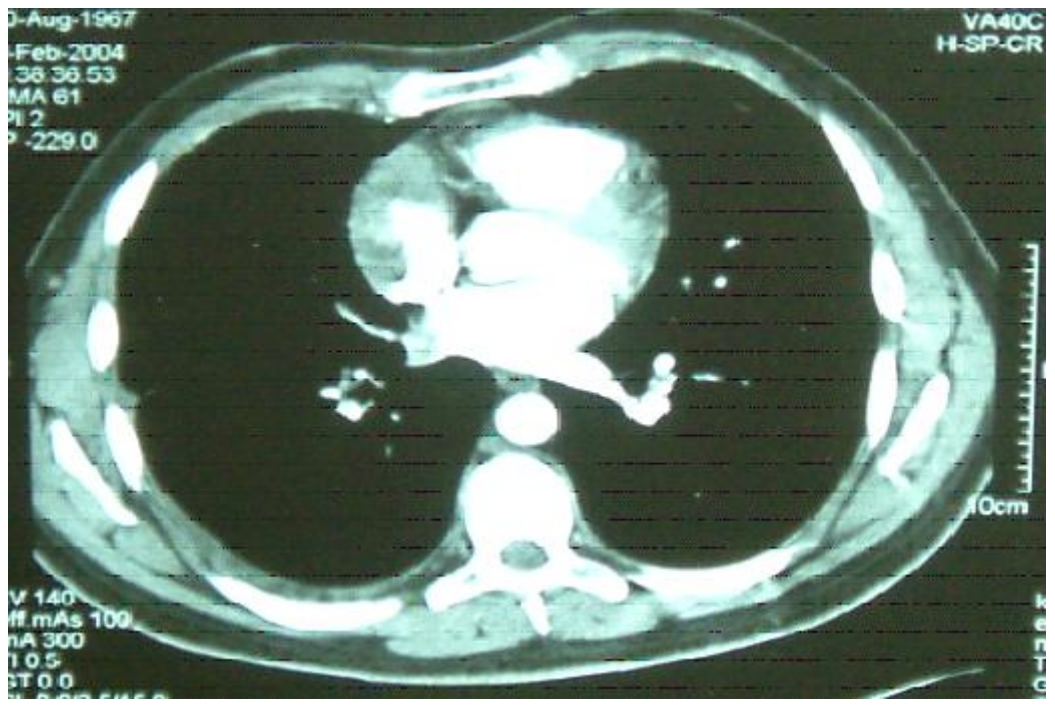

Supplement: MOESM2 [file 9638366]
